# Supplementary material for: SmartCards as Analogous Tools to Operate Tablet Computers for Elderly—A Feasibility Study
Source: MDPI journal article supplement (doi:10.3390/healthcare9091198), 2021-09-10
Supplement: s1 [file s1]

## Supplementary materials

Table S1. Pre-post comparison of self-reported well-being.

|         |    | During the past two weeks I felt glad and in a good mood. | During the past two weeks I felt calm and at ease. | During the past two weeks I felt energetic and positive. | During the past two weeks I felt refreshed and well rested when I woke up. | During the past two weeks my day-to-day life was full of things that intrigued me. |
|---------|----|-----------------------------------------------------------|----------------------------------------------------|----------------------------------------------------------|----------------------------------------------------------------------------|------------------------------------------------------------------------------------|
| Group A |    |                                                           |                                                    |                                                          |                                                                            |                                                                                    |
| pre     | M  | 3,25                                                      | 2,17                                               | 3,08                                                     | 2,33                                                                       | 3,55                                                                               |
|         | SD | ,866                                                      | ,937                                               | ,996                                                     | 1,303                                                                      | ,934                                                                               |
| post    | M  | 3,58                                                      | 2,83                                               | 3,50                                                     | 2,92                                                                       | 3,75                                                                               |
|         | SD | 1,240                                                     | 1,193                                              | 1,243                                                    | 1,881                                                                      | 1,765                                                                              |
|         | z  | -1,26                                                     | -1,54                                              | -1,29                                                    | -1,08                                                                      | -,120                                                                              |
|         | p  | ,206                                                      | ,123                                               | ,194                                                     | ,277                                                                       | ,905                                                                               |
| Group B |    |                                                           |                                                    |                                                          |                                                                            |                                                                                    |
| pre     | M  | 4,00                                                      | 4,00                                               | 3,56                                                     | 4,11                                                                       | 4,11                                                                               |
|         | SD | 1,000                                                     | 1,000                                              | 1,014                                                    | 1,269                                                                      | 1,054                                                                              |
| post    | M  | 3,33                                                      | 3,00                                               | 4,33                                                     | 3,67                                                                       | 4,33                                                                               |
|         | SD | 1,033                                                     | 1,789                                              | ,816                                                     | 1,506                                                                      | 1,211                                                                              |
|         | z  | -1,34                                                     | -1,47                                              | -1,00                                                    | -,447                                                                      | -1,41                                                                              |
|         | p  | ,180                                                      | ,141                                               | ,317                                                     | ,655                                                                       | ,157                                                                               |
| Group C |    |                                                           |                                                    |                                                          |                                                                            |                                                                                    |
| pre     | M  | 3,56                                                      | 3,78                                               | 3,22                                                     | 3,67                                                                       | 4,33                                                                               |
|         | SD | 1,509                                                     | 1,481                                              | 1,394                                                    | 1,500                                                                      | 1,323                                                                              |
| post    | M  | 4,25                                                      | 3,88                                               | 3,38                                                     | 3,88                                                                       | 4,00                                                                               |
|         | SD | 1,389                                                     | 1,553                                              | 1,598                                                    | 1,553                                                                      | 1,309                                                                              |
|         | z  | -1,63                                                     | ,00                                                | ,00                                                      | ,00                                                                        | -1,63                                                                              |
|         | p  | ,102                                                      | 1,00                                               | 1,00                                                     | 1,00                                                                       | ,102                                                                               |

Wilcoxon Signed Ranks Test

1 "very much so" 2 "mostly" 3 "partly" 4 "only a little" 5 "not at all"

**Table S2. Pre-post comparison of self-reported autonomy.**

|                |    | How much latitude do you have to make your own decisions? | To what extent can you influence your own future? | Do you think that the people around you respect your independence? | To what extent are you able to do what you wish to do? |
|----------------|----|-----------------------------------------------------------|---------------------------------------------------|--------------------------------------------------------------------|--------------------------------------------------------|
| <b>Group A</b> |    |                                                           |                                                   |                                                                    |                                                        |
| pre            | M  | 4,42                                                      | 3,17                                              | 4,25                                                               | 3,08                                                   |
|                | SD | ,669                                                      | 1,115                                             | ,754                                                               | 1,165                                                  |
| post           | M  | 3,42                                                      | 3,33                                              | 4,25                                                               | 4,00                                                   |
|                | SD | 1,165                                                     | 1,497                                             | 1,215                                                              | 1,206                                                  |
|                | z  | -2,326                                                    | -,398                                             | -,159                                                              | -1,807                                                 |
|                | p  | ,020                                                      | ,690                                              | ,874                                                               | ,071                                                   |
| <b>Group B</b> |    |                                                           |                                                   |                                                                    |                                                        |
| pre            | M  | 4,11                                                      | 3,22                                              | 4,00                                                               | 4,22                                                   |
|                | SD | ,782                                                      | 1,394                                             | 1,000                                                              | ,833                                                   |
| post           | M  | 4,00                                                      | 3,00                                              | 4,50                                                               | 3,33                                                   |
|                | SD | 1,095                                                     | 1,265                                             | ,837                                                               | 1,211                                                  |
|                | z  | -,816                                                     | ,000                                              | -1,000                                                             | -,850                                                  |
|                | p  | ,414                                                      | 1,000                                             | ,317                                                               | ,395                                                   |
| <b>Group C</b> |    |                                                           |                                                   |                                                                    |                                                        |
| pre            | M  | 4,11                                                      | 2,33                                              | 3,88                                                               | 3,56                                                   |
|                | SD | ,782                                                      | 1,414                                             | 1,126                                                              | 1,333                                                  |
| post           | M  | 4,25                                                      | 2,63                                              | 4,25                                                               | 3,63                                                   |
|                | SD | 1,165                                                     | 1,061                                             | ,886                                                               | 1,061                                                  |
|                | z  | -,378                                                     | -,333                                             | ,000                                                               | -,378                                                  |
|                | p  | ,705                                                      | ,739                                              | 1,000                                                              | ,705                                                   |

Wilcoxon Signed Ranks Test

1 "very much so" 2 "mostly" 3 "partly" 4 "only a little" 5 "not at all"

**Table S3. Pre-post comparison of self-reported loneliness**

|                |    | I feel in unison with the people around me. | I have a lot in common with the people in my vicinity. | My interests and ideas are shared by the people around me. | If I want to find company I can and do. | There are people who I can exchange thoughts with. |
|----------------|----|---------------------------------------------|--------------------------------------------------------|------------------------------------------------------------|-----------------------------------------|----------------------------------------------------|
| <b>Group A</b> |    |                                             |                                                        |                                                            |                                         |                                                    |
| pre            | M  | 1,73                                        | 2,55                                                   | 3,00                                                       | 1,36                                    | 1,18                                               |
|                | SD | ,91                                         | 1,13                                                   | 1,00                                                       | ,67                                     | ,41                                                |
| post           | M  | 1,67                                        | 1,83                                                   | 1,67                                                       | 1,25                                    | 1,50                                               |
|                | SD | 1,16                                        | 1,19                                                   | 1,16                                                       | ,62                                     | ,67                                                |
|                | z  | -,367                                       | -1,515                                                 | -2,026                                                     | -,378                                   | -1,414                                             |
|                | p  | ,713                                        | ,130                                                   | ,043                                                       | ,705                                    | ,157                                               |
| <b>Group B</b> |    |                                             |                                                        |                                                            |                                         |                                                    |
| pre            | M  | 1,22                                        | 2,33                                                   | 2,22                                                       | 1,44                                    | 1,67                                               |
|                | SD | ,67                                         | 1,23                                                   | 1,30                                                       | 1,01                                    | 1,12                                               |
| post           | M  | 1,33                                        | 4,00                                                   | 3,00                                                       | 1,83                                    | 2,00                                               |
|                | SD | ,52                                         | 1,26                                                   | 1,41                                                       | 1,60                                    | 1,09                                               |
|                | z  | -1,414                                      | -,816                                                  | -,736                                                      | -1,342                                  | -,816                                              |
|                | p  | ,157                                        | ,414                                                   | ,461                                                       | ,180                                    | ,414                                               |
| <b>Group C</b> |    |                                             |                                                        |                                                            |                                         |                                                    |
| pre            | M  | 2,22                                        | 2,44                                                   | 2,67                                                       | 2,33                                    | 2,22                                               |
|                | SD | 1,48                                        | 1,81                                                   | 1,80                                                       | 1,41                                    | 1,48                                               |
| post           | M  | 2,50                                        | 3,00                                                   | 2,50                                                       | 1,88                                    | 2,25                                               |
|                | SD | 1,51                                        | 1,41                                                   | 1,69                                                       | 1,36                                    | 1,58                                               |
|                | z  | -1,134                                      | -1,633                                                 | -,577                                                      | -1,000                                  | -,707                                              |
|                | p  | ,257                                        | ,102                                                   | ,564                                                       | ,317                                    | ,480                                               |

Wilcoxon Signed Ranks Test

1 "very much so" 2 "mostly" 3 "partly" 4 "only a little" 5 "not at all"

**Table S4. Pre-post comparison of self-reported cognitive ability**

|                |           | Lately I often mix up names, phone numbers and dates. | Lately it has been harder to concentrate on a task. | Lately it is more difficult for me to follow other people's conversations. | Lately it has been more difficult to deal with problems. |
|----------------|-----------|-------------------------------------------------------|-----------------------------------------------------|----------------------------------------------------------------------------|----------------------------------------------------------|
| <b>Group A</b> |           |                                                       |                                                     |                                                                            |                                                          |
| pre            | <i>M</i>  | 3,33                                                  | 3,25                                                | 4,25                                                                       | 3,58                                                     |
|                | <i>SD</i> | 1,30                                                  | 1,60                                                | 1,06                                                                       | 1,44                                                     |
| post           | <i>M</i>  | 3,92                                                  | 4,42                                                | 4,92                                                                       | 4,83                                                     |
|                | <i>SD</i> | 1,68                                                  | 1,24                                                | ,29                                                                        | ,39                                                      |
|                | <i>z</i>  | -1,150                                                | -2,124                                              | -1,807                                                                     | -2,392                                                   |
|                | <i>p</i>  | ,250                                                  | ,034                                                | ,071                                                                       | ,017                                                     |
| <b>Group B</b> |           |                                                       |                                                     |                                                                            |                                                          |
| pre            | <i>M</i>  | 3,33                                                  | 3,22                                                | 4,44                                                                       | 3,33                                                     |
|                | <i>SD</i> | 1,41                                                  | 1,20                                                | ,88                                                                        | 1,58                                                     |
| post           | <i>M</i>  | 3,67                                                  | 4,33                                                | 4,83                                                                       | 5,00                                                     |
|                | <i>SD</i> | 1,75                                                  | 1,21                                                | ,41                                                                        | ,000                                                     |
|                | <i>z</i>  | -1,134                                                | -,816                                               | -1,633                                                                     | -1,890                                                   |
|                | <i>p</i>  | ,257                                                  | ,414                                                | ,102                                                                       | ,059                                                     |
| <b>Group C</b> |           |                                                       |                                                     |                                                                            |                                                          |
| pre            | <i>M</i>  | 2,89                                                  | 2,78                                                | 3,78                                                                       | 2,25                                                     |
|                | <i>SD</i> | 1,83                                                  | 1,92                                                | 1,64                                                                       | 1,49                                                     |
| post           | <i>M</i>  | 3,13                                                  | 2,88                                                | 4,13                                                                       | 3,88                                                     |
|                | <i>SD</i> | 1,46                                                  | 1,55                                                | 1,36                                                                       | 1,46                                                     |
|                | <i>z</i>  | -,175                                                 | -,184                                               | -,412                                                                      | -1,841                                                   |
|                | <i>p</i>  | ,861                                                  | ,854                                                | ,680                                                                       | ,066                                                     |

Wilcoxon Signed Ranks Test

1 "very much so" 2 "mostly" 3 "partly" 4 "only a little" 5 "not at all"
